# Supplementary material for: Broad Neutralization of SARS-CoV-2 Variants, Including Omicron, following Breakthrough Infection with Delta in COVID-19-Vaccinated Individuals
Source: PubMed Central journal article supplement (PMC9040729; doi:10.1128/mbio.03798-21), 2022-03-17
Supplement: mbio.03798-21-st001.pdf [file mbio.03798-21-st001.pdf]

| Patient number | Vaccine type | Days post onset of symptoms | Days since last vaccine | Severity of disease | Age | Co-morbidities                                   | Any immunosuppression/immune dysfunction | \$ IgG EC50 WT | \$ IgG EC50 Delta | \$ IgM EC50 WT | \$ IgM EC50 Delta | N IgG OD | N IgG fold change above background | WT ID50 | Data in figure 2 |              |              |                |         | Data in figure 3 |                |  |
|----------------|--------------|-----------------------------|-------------------------|---------------------|-----|--------------------------------------------------|------------------------------------------|----------------|-------------------|----------------|-------------------|----------|------------------------------------|---------|------------------|--------------|--------------|----------------|---------|------------------|----------------|--|
|                |              |                             |                         |                     |     |                                                  |                                          |                |                   |                |                   |          |                                    |         | B.1.1.7 ID50     | B.1.351 ID50 | B.1.621 ID50 | B.1.617.2 ID50 | WT ID50 | B.1.617.2 ID50   | B.1.1.529 ID50 |  |
| 9              | AZ           | 18                          | 69                      | 1                   | 42  | Hypothyroid                                      | Nil                                      | 1386           | 1318              | 117            | 104               | 1.532    | 15.6                               | 1782    | 3784             | 415          | 1274         | 1019           | 1117    | 875              | 146            |  |
| 10             | AZ           | 1                           | 118                     | 4                   | 82  | CCF, CKD4, T2DM, CVA                             | Nil                                      | <25            | 25                | 25             | <25               | 0.357    | 3.6                                | 28      | <25              | <25          | 26           | <25            |         |                  |                |  |
| 10             | AZ           | 9                           | 118                     | 4                   | 82  | CCF, CKD4, T2DM, CVA                             | Nil                                      | 24665          | 23955             | 37             | 26                | 1.081    | 11                                 | 15996   | 27416            | 24972        | 23823        | 20277          |         |                  |                |  |
| 10             | AZ           | 15                          | 118                     | 4                   | 82  | CCF, CKD4, T2DM, CVA                             | Nil                                      | 14671          | 15440             | 25             | 25                | 1.125    | 11.4                               | 8472    | 13521            | 10348        | 6546         | 14256          | 7638    | 18967            | 5012           |  |
| 11             | AZ           | 7                           | 100                     | 4                   | 83  | Gastric GIST+mets, COPD                          | imatinib                                 | <25            | <25               | <25            | <25               | 0.257    | 2.6                                | <25     | <25              | <25          | <25          | <25            |         |                  |                |  |
| 11             | AZ           | 15                          | 100                     | 4                   | 83  | Gastric GIST+mets, COPD                          | imatinib                                 | 1861           | 2180              | 74             | 57                | 1.469    | 14.9                               | 794     | 4325             | 1754         | 2477         | 658            | 1122    | 977              | 46             |  |
| 12             | AZ           | 13                          | 94                      | 0                   | 66  | Asthma, OSA                                      | nil                                      | 10022          | 10815             | 714            | 717               | 1.046    | 10.6                               | 14997   | 8395             | 12472        | 13868        | 7551           | 8054    | 13305            | 7980           |  |
| 13             | AZ           | 12                          | 68                      | 0                   | 89  | metastatic gastric cancer, bladder cancer, frail | Nil (palliative)                         | <25            | <25               | 25             | <25               | 0.304    | 3.1                                | 32      | <25              | <25          | <25          | <25            |         |                  |                |  |
| 14             | AZ           | 13                          | 102                     | 0                   | 61  | T2DM                                             | Nil                                      | 17905          | 18601             | 696            | 352               | 1.109    | 11.3                               | 48753   | 17701            | 4966         | 15885        | 15812          | 6266    | 19055            | 17947          |  |
| 15             | AZ           | 14                          | 106                     | 0                   | 74  | ?                                                | Nil                                      | 26506          | 30040             | 548            | 275               | 0.617    | 6.3                                | 6353    | 17498            | 10093        | 7278         | 8770           |         |                  |                |  |
| 16             | AZ           | 21                          | 74                      | 0                   | 68  | Nil                                              | Nil                                      | 10902          | 11263             | 59             | 45                | 1.543    | 15.7                               | 6310    | 10520            | 5358         | 6577         | 13305          |         |                  |                |  |
| 17             | AZ           | 15                          | 57                      | 1                   | 88  | CKD, T2DM, Asthma                                | Nil                                      | 6245           | 6615              | 774            | 568               | 1.315    | 13.4                               | 1837    | 8590             | 5998         | 7362         | 6237           |         |                  |                |  |
| 17             | AZ           | 20                          | 57                      | 1                   | 88  | CKD, T2DM, Asthma                                | Nil                                      | 5713           | 6471              | 1023           | 782               | 1.51     | 15.3                               | 2113    | 8933             | 5781         | 6934         | 4102           |         |                  |                |  |
| 18             | AZ           | 7                           | 109                     | 4                   | 63  | HTN, T2DM                                        | Nil                                      | 20616          | 21496             | 372            | 255               | 0.145    | 1.5                                | 8091    | 7980             | 8967         | 7889         | 6223           |         |                  |                |  |
| 18             | AZ           | 18                          | 109                     | 4                   | 63  | HTN, T2DM                                        | Nil                                      | 11651          | 14268             | 543            | 409               | 1.722    | 17.5                               | 54954   | 17100            | 3741         | 24099        | 24547          |         |                  |                |  |
| 19             | AZ           | 1                           | 167                     | 1                   | 103 | Frail                                            | Nil                                      | <25            | <25               | <25            | <25               | 0.176    | 1.8                                | <25     | <25              | <25          | <25          | <25            |         |                  |                |  |
| 19             | AZ           | 11                          | 167                     | 1                   | 103 | Frail                                            | Nil                                      | 102            | 249               | 258            | 327               | 1.495    | 15.2                               | 500     | 861              | <25          | 65           | 1710           |         |                  |                |  |
| 20             | AZ           | 8                           | 71                      | 0                   | 71  | T2DM, dialysis, HTN, cured HCV                   | Nil                                      | 2369           | 2967              | 61             | 62                | 0.781    | 7.9                                | 5572    | 1690             | 1132         | 1300         | 1109           |         |                  |                |  |
| 20             | AZ           | 35                          | 72                      | 0                   | 71  | T2DM, dialysis, HTN, cured HCV                   | Nil                                      | 2548           | 3111              | 87             | 76                | 1.391    | 14.1                               | 4875    | 4550             | 3334         | 2851         | 995            |         |                  |                |  |
| 21             | AZ           | 4                           | 72                      | 1                   | 56  | hepatobiliary cancer                             | Nil                                      | 19427          | 19882             | 306            | 199               | 0.943    | 9.6                                | 9616    | 7962             | 5848         | 7499         | 7834           |         |                  |                |  |
| 21             | AZ           | 9                           | 72                      | 1                   | 56  | hepatobiliary cancer                             | Nil                                      | 21359          | 21777             | 450            | 481               | 1.342    | 13.6                               | 16634   | 22803            | 16904        | 21086        | 25410          |         |                  |                |  |
| 22             | AZ           | 3                           | 109                     | 4                   | 33  | Epilepsy                                         | Nil                                      | <25            | <25               | <25            | <25               | 0.254    | 2.6                                | 25      | 25               | 25           | 25           | <25            |         |                  |                |  |
| 22             | AZ           | 9                           | 109                     | 4                   | 33  | Epilepsy                                         | Nil                                      | 14149          | 14481             | 604            | 521               | 0.661    | 6.7                                | 2661    | 11455            | 12942        | 11588        | 7161           |         |                  |                |  |
| 22             | AZ           | 19                          | 109                     | 4                   | 33  | Epilepsy                                         | Nil                                      | 19657          | 18592             | 381            | 360               | 1.492    | 15.1                               | 2979    | 3606             | 5819         | 5085         | 3412           | 2825    | 9506             | 6516           |  |
| 23             | AZ           | 2                           | 108                     | 0                   | 96  | Alzheimer's, HTN, CVA                            | Nil                                      | 93             | 93                | 43             | 26                | 0.143    | 1.5                                | <25     | 102              | 131          | 132          | 89             |         |                  |                |  |
| 23             | AZ           | 14                          | 167                     | 0                   | 96  | Alzheimer's, HTN, CVA                            | Nil                                      | 48122          | 46450             | 6820           | 6882              | 0.873    | 8.9                                | 31189   | 35892            | 7161         | 41210        | 36308          | 22336   | 51880            | 22336          |  |
| 25             | AZ           | 21                          | 33                      | 0                   | 25  | None                                             | Nil                                      | 3642           | 4025              | 301            | 250               | 0.534    | 5.4                                | 2710    | 1374             | 4420         | 2377         | 2773           |         |                  |                |  |
| 26             | AZ           | 43                          | 77                      | 1                   | 67  | Rheumatoid arthritis                             | methotrexate, Certolizumab               | 948            | 924               | 751            | 831               | 0.792    | 8                                  | 2427    | 1972             | 2460         | 1828         | 2355           |         |                  |                |  |
| 26             | AZ           | 53                          | 77                      | 1                   | 67  | Rheumatoid arthritis                             | methotrexate, Certolizumab               | 1320           | 1662              | 323            | 787               | 0.688    | 7                                  | 2228    | 1416             | 3475         | 3540         | 10691          |         |                  |                |  |
| 27             | AZ           | 37                          | 165                     | 4                   | 26  | SMCIA mutation, epilepsy, developmental delay    | Nil                                      | 1100           | 1072              | 25             | 25                | 0.937    | 9.5                                | 1811    | 1910             | 1542         | 1361         | 1714           |         |                  |                |  |
| 28             | AZ           | 5                           | 41                      | 4                   | 59  | t2DM                                             | Nil                                      | 3397           | 3784              | 109            | 117               | 0.912    | 9.3                                | 968     | 2094             | 3631         | 2917         | 1923           |         |                  |                |  |
| 28             | AZ           | 14                          | 41                      | 4                   | 59  | t2DM                                             | Nil                                      | 8394           | 8931              | 303            | 436               | 0.958    | 9.7                                | 2985    | 7780             | 10139        | 6982         | 3365           | 6138    | 5272             | 2317           |  |
| 29             | AZ           | 12                          | 125                     | 1                   | 78  | t2DM                                             | Nil                                      | 27818          | 28802             | 182            | 119               | 0.9      | 9.1                                | 14997   | 6592             | 8035         | 11967        | 25410          |         |                  |                |  |
| 39             | AZ           | 8                           | 29                      | 1                   | 20  | Nil                                              | Nil                                      | 259            | 328               | 25             | 25                | 0.77     | 7.8                                | 2328    | 2443             | 1663         | 2477         | 2667           |         |                  |                |  |
| 41             | AZ           | 89                          | 40                      | 0                   | 38  | Crohn's                                          | Nil                                      | 28             | 43                | 25             | <25               | 0.465    | 4.7                                | 186     | 228              | 307          | 274          | 822            |         |                  |                |  |
| 42             | AZ           | -1                          | 120                     | 0                   | 75  | HTN, Bladder outflow obstruction, Anticoagulated | Nil                                      | 1434           | 1240              | 25             | 25                | 0.915    | 9.3                                | 360     | 2477             | 1611         | 2028         | 1799           |         |                  |                |  |
| 1              | Pfizer       | 18                          | 58                      | 4                   | 66  | Lupus                                            | Aza, HCQ, Pred                           | 2127           | 2322              | 67             | 37                | 1.517    | 15.4                               | 4159    | 6934             | 698          | 2399         | 7834           | 3963    | 11858            | 146            |  |
| 1              | Pfizer       | 25                          | 58                      | 4                   | 66  | Lupus                                            | Aza, HCQ, Pred                           | 562            | 1102              | 620            | 711               | 1.335    | 13.6                               | 1671    | 689              | 508          | 577          | 1758           |         |                  |                |  |
| 2              | Pfizer       | 12                          | 146                     | 3                   | 83  | AF, HTN, Chol                                    | Nil                                      | 6042           | 6452              | 607            | 498               | 0.478    | 4.9                                | 1884    | 3467             | 3917         | 2014         | 3428           | 2104    | 5000             | 3041           |  |
| 2              | Pfizer       | 16                          | 146                     | 3                   | 83  | AF, HTN, Chol                                    | Nil                                      | 8920           | 7847              | 1382           | 1103              | 1.101    | 11.2                               | 4529    | 11695            | 12050        | 7745         | 10162          |         |                  |                |  |
| 3              | Pfizer       | 15                          | 76                      | 0                   | 49  | HTN, T2DM, dialysis                              | nil                                      | 5712           | 8885              | 703            | 660               | 0.638    | 6.5                                | 2624    | 7998             | 5729         | 5821         | 15849          | 3589    | 10000            | 2588           |  |
| 4              | Pfizer       | 1                           | 89                      | 0                   | 63  | Liver cirrhosis                                  | Nil                                      | 115            | 146               | 25             | 25                | 0.231    | 2.3                                | <25     | 95               | 156          | 87           | <25            |         |                  |                |  |
| 4              | Pfizer       | 6                           | 89                      | 0                   | 63  | Liver cirrhosis                                  | Nil                                      | 74             | 64                | 25             | 25                | 0.249    | 2.5                                | 27      | 61               | 84           | 80           | <25            |         |                  |                |  |
| 4              | Pfizer       | 16                          | 89                      | 0                   | 63  | Liver cirrhosis                                  | Nil                                      | 6525           | 6827              | 334            | 205               | 0.802    | 8.1                                | 1718    | 7870             | 6067         | 7379         | 5943           | 2000    | 9099             | 3890           |  |
| 5              | Pfizer       | 6                           | 127                     | 0                   | 95  | COPD, asthma, BPH                                | Nil                                      | 25             | 25                | <25            | <25               | 0.188    | 1.9                                | <25     | <25              | <25          | 32           | <25            |         |                  |                |  |
| 5              | Pfizer       | 11                          | 127                     | 0                   | 95  | COPD, asthma, BPH                                | Nil                                      | 2744           | 2764              | 43             | 34                | 0.601    | 6.1                                | 1919    | 3192             | 2685         | 2924         | 1766           |         |                  |                |  |
| 6              | Pfizer       | 13                          | 100                     | 4                   | 57  | Renal transplant                                 | Tacrolimus, prednisolone, mycophenolate  | <25            | <25               | 48             | 56                | 0.398    | 4                                  | <25     | <25              | <25          | <25          | <25            |         |                  |                |  |
| 6              | Pfizer       | 16                          | 100                     | 4                   | 57  | Renal transplant                                 | Tacrolimus, prednisolone, mycophenolate  | 25             | 66                | 3185           | 3932              | 1.168    | 11.9                               | 7079    | 3981             | 3162         | 5408         | 47863          | 3581    | 10495            | 210            |  |
| 7              | Pfizer       | 1                           | 134                     | 0                   | 86  | HTN                                              | Nil                                      | 14221          | 14012             | 47             | 11                | 1.699    | 17.2                               | 6622    | 11749            | 16866        | 11272        | 11246          |         |                  |                |  |
| 8              | Pfizer       | 11                          | 137                     | 1                   | 88  | T2DM, Hypertension                               | Nil                                      | 4560           | 4451              | 25             | 25                | 0.406    | 4.1                                | 2328    | 4699             | 4446         | 3733         | 3381           |         |                  |                |  |
| 24             | Pfizer       | 21                          | 105                     | 0                   | 24  | Dialysis                                         | Tacrolimus, MMF, Pred                    | 10911          | 11430             | 1106           | 1851              | 1.353    | 13.7                               | 5224    | 7925             | 15942        | 8892         | 25293          | 3357    | 24660            | 7674           |  |
| 30             | Pfizer       | 0                           | 171                     | 4                   | 75  | OSA, polychondritis                              | Methotrexate                             | 229            | 234               | 56             | 48                | 0.352    | 3.6                                | 492     | 327              | 196          | 319          | 279            |         |                  |                |  |
| 30             | Pfizer       | 8                           | 171                     | 4                   | 75  | OSA, polychondritis                              | Methotrexate                             | 4347           | 4666              | 1313           | 1232              | 1.551    | 15.7                               | 7482    | 6823             | 973          | 1265         | 8128           |         |                  |                |  |
| 31             | Pfizer       | 3                           | 154                     | 0                   | 76  | Stroke                                           | Nil                                      | 9949           | 11028             | 483            | 387               | 0.133    | 1.4                                | 8260    | 8147             | 3083         | 6209         | 7311           |         |                  |                |  |
| 31             | Pfizer       | 13                          | 154                     | 0                   | 76  | Stroke                                           | Nil                                      | 48347          | 46322             | 708            | 588               | 1.121    | 11.4                               | 80724   | 100000           | 84918        | 53088        | 81283          |         |                  |                |  |
| 32             | Pfizer       | 16                          | 149                     | 0                   | 79  | t2DM, frail                                      | Nil                                      | 4099           | 3966              | 369            | 632               | 0.249    | 2.5                                | 3289    | 5598             | 5943         | 4966         | 3707           | 1262    | 10593            | 1959           |  |
| 33             | Pfizer       | 10                          | 173                     | 0                   | 95  | T2DM, CKD3, COPD, oesophagitis (chronic)         | Nil                                      | 30             | 49                | 78             | 61                | 0.139    | 1.4                                | 25      | <25              | 25           | 25           | <25            |         |                  |                |  |
| 34             | Pfizer       | 34                          | 132                     | 3                   | 79  | Polycystic kidneys, HTN, gout                    | Nil                                      | 7351           | 7389              | 904            | 2758              | 1.277    | 13                                 | 7962    | 11272            | 3811         | 5272         | 4797           |         |                  |                |  |
| 35             | Pfizer       | 34                          | 149                     | 4                   | 80  | Cardiovascular disease, COPD                     | Nil                                      | 1811           | 2310              | 395            | 2283              | 1.349    | 13.7                               | 4808    | 1486             | 1476         | 3273         | 9057           |         |                  |                |  |
| 36             | Pfizer       | 25                          | 179                     | 1                   | 88  | HTN, Angina                                      | Nil                                      | 3266           | 3903              | 72             | 64                | 0.413    | 4.2                                | 4487    | 5689             | 1435         | 4467         | 1282           |         |                  |                |  |
