# Supplementary material for: Broad Neutralization of SARS-CoV-2 Variants, Including Omicron, following Breakthrough Infection with Delta in COVID-19-Vaccinated Individuals
Source: PubMed Central journal article supplement (PMC9040729; doi:10.1128/mbio.03798-21), 2022-03-17
Supplement: mbio.03798-21-st002.pdf [file mbio.03798-21-st002.pdf]

| Patient number | Vaccine type | Days post onset of symptoms | Severity of disease | Age | Co-morbidities               | S IgG EC50 WT | S IgG EC50 Delta | S IgM EC50 WT | S IgM EC50 Delta | N IgG OD | N IgG fold change above background | WT ID50           | B.1.1.7 ID50 | B.1.351 ID50 | B.1.621 ID50 | B.1.617.2 ID50 | WT ID50           | B.1.617.2 ID50 | B.1.1.529 ID50 |
|----------------|--------------|-----------------------------|---------------------|-----|------------------------------|---------------|------------------|---------------|------------------|----------|------------------------------------|-------------------|--------------|--------------|--------------|----------------|-------------------|----------------|----------------|
|                |              |                             |                     |     |                              |               |                  |               |                  |          |                                    | Data for figure 2 |              |              |              |                | Data for figure 3 |                |                |
| 1              | zero         | 17                          | 5                   | 35  | Nil                          | 514           | 1089             | 472           | 677              | 1.45     | 14.7                               | 1009              | 649          | 475          | 566          | 1845           | 830               | 2500           | 90             |
| 2              | zero         | 15                          | 5                   | 39  | T2DM, Morbid obesity         | 463           | 1944             | 400           | 1216             | 1.423    | 14.4                               | 9908              | 2153         | 762          | 2443         | 14355          | 1271              | 10000          | 281            |
| 3              | zero         | 19                          | 2                   | 82  | HTN                          | 312           | 1218             | 722           | 2444             | 1.737    | 17.6                               | 1117              | 1262         | 1476         | 1035         | 8511           | 916               | 8730           | 282            |
| 4              | zero         | 13                          | 1 or 2              | 26  | Nil                          | 25            | 89               | 1808          | 3510             | 1.131    | 11.5                               | 4325              | 1607         | 410          | 2275         | 13964          |                   |                |                |
| 5              | zero         | 16                          | 5                   | 67  | HIV, coarctation             | 25            | 48               | 350           | 777              | 1.271    | 12.9                               | 1644              | 1300         | 793          | 1211         | 4121           | 731               | 7079           | 356            |
| 6              | zero         | 18                          | 1 or 2              | 28  | Nil                          | 397           | 1226             | 2746          | 3461             | 1.194    | 12.1                               | 1321              | 1064         | 416          | 1242         | 6934           | 1146              | 7464           | 231            |
| 7              | zero         | 12                          | 1 or 2              | 37  | Nil                          | 25            | 38               | 961           | 1144             | 0.428    | 4.3                                | 535               | 282          | 301          | 443          | 2168           |                   |                |                |
| 8              | zero         | 15                          | 4                   | 73  | T2DM, HTN, Nephrectomy, MGUS | 42            | 605              | 1422          | 1888             | 1.224    | 12.4                               | 456               | 234          | 1786         | 1245         | 2642           | 262               | 2259           | 28             |
| 9              | zero         | 15                          | 5                   | 43  | Morbidly obesity, T2DM       | 25            | 741              | 1091          | 1520             | 1.614    | 16.4                               | 4645              | 7211         | 923          | 3864         | 15524          | 5957              | 22387          | 1007           |
| 10             | zero         | 13                          | 4                   | 31  | Pregnancy                    | 25            | 25               | 403           | 724              | 0.645    | 6.5                                | 530               | 231          | 211          | 167          | 1462           | 417               | 1718           | 52             |
| 11             | zero         | 14                          | 1 or 2              | 34  | Nil                          | <25           | <25              | 25            | 25               | 0.238    | 2.4                                | <25               | <25          | 36           | 26           | <25            |                   |                |                |
| 12             | zero         | 18                          | 1 or 2              | 55  | Nil                          | <25           | <25              | <25           | <25              | 0.193    | 2                                  | <25               | <25          | <25          | <25          |                |                   |                |                |
| 13             | zero         | 14                          | 2                   | 74  | OSA                          | <25           | <25              | 99            | 155              | 0.225    | 2.3                                | 30                | <25          | <25          | 26           | 611            | 32                | 681            | <25            |
| 14             | zero         | 14                          | 1 or 2              | 27  | Asthma                       | 157           | 557              | 3139          | 7575             | 0.909    | 9.2                                | 4159              | 1694         | 881          | 3373         | 21878          | 1242              | 15631          | 283            |
| 15             | zero         | 18                          | 5                   | 44  | Nil                          | 1070          | 2622             | 7337          | 15574            | 1.48     | 15                                 | 3327              | 3013         | 2213         | 2979         | 18793          | 3999              | 27669          | 535            |
| 16             | zero         | 13                          | 2                   | 46  | Nil                          | 25            | 25               | 1282          | 5627             | 0.873    | 8.9                                | 1016              | 1387         | 218          | 773          | 15996          |                   |                |                |
| 17             | zero         | 13                          | 4                   | 25  | Nil                          | 25            | 42               | 675           | 913              | 1.133    | 11.5                               | 1127              | 360          | 137          | 242          | 1941           | 776               | 2944           | 46             |
| 18             | zero         | 13                          | 4                   | 39  | T2DM, pregnant               | 25            | 358              | 1412          | 2882             | 0.686    | 7                                  | 1183              | 3524         | 526          | 3062         | 11967          | 1189              | 15959          | 67             |
| 19             | zero         | 22                          | 1 or 2              | 25  | Nil                          | <25           | <25              | 25            | 52               | 0.213    | 2.2                                | 125               | 35           | <25          | 41           | 119            | 46                | 215            | <25            |
